# Supplementary material for: Early Discrimination and Prediction of C. fimbriata-Infected Sweetpotatoes during the Asymptomatic Period Using Electronic Nose
Source: MDPI journal article supplement (doi:10.3390/foods11131919), 2022-06-28
Supplement: s1 [file s1]

Table S1 The sensor array of the E-nose.

| Number | Sensor  | Substance Sensitivity                        |
|--------|---------|----------------------------------------------|
| S1     | TGS2620 | Alcohol, organic solvents                    |
| S2     | TGS826  | Ammonia                                      |
| S3     | TGS822  | Organic solvents                             |
| S4     | TGS832  | Freon, R0134a, R-404a, R-407c, R-410         |
| S5     | TGS813  | Methane, propane, butane                     |
| S6     | TGS816  | Methane, propane                             |
| S7     | TGS2600 | Hydrogen, alcohol                            |
| S8     | TGS2610 | Butane, liquefied petroleum gas              |
| S9     | TGS2611 | Methane, natural gas                         |
| S10    | TGS2615 | Hydrogen                                     |
| S11    | TGS2602 | VOCs, ammonia, hydrogen sulfide              |
| S12    | TGS2603 | Amine series, organic sulfur compounds       |
| S13    | HTU20   | Temperature and humidity, -40~105℃, 0~100%RH |

Table S2 The relative humidity in the air chamber during sample testing using E-nose.

| Time (h) | Relative humidity (%) |
|----------|-----------------------|
| 0        | $9.82 \pm 0.35$       |
| 8        | $11.51 \pm 0.99$      |
| 16       | $10.71 \pm 1.3$       |
| 24       | $10.68 \pm 0.87$      |
| 32       | $10.77 \pm 0.87$      |
| 40       | $10.64 \pm 1.13$      |
| 48       | $9.70 \pm 0.85$       |
| 56       | $11.24 \pm 0.94$      |
| 64       | $9.97 \pm 0.61$       |
| 72       | $10.33 \pm 2.57$      |

Table S3 Content of different volatile compounds detected and quantified in *C. fimbriata*-infected group and the control group by HS-SPME/GC-MS from 0 to 72 h. (Unit: ng g<sup>-1</sup> FW equivalent of 2-octanol)

| Category  | Compound            | 0 h<br>(Control)                     | 0 h                                 | 8 h                       | 16 h                                | 24 h                                | 32 h                      | 40 h                                | 48 h                      | 56 h                                | 64 h                      | 72 h                     |
|-----------|---------------------|--------------------------------------|-------------------------------------|---------------------------|-------------------------------------|-------------------------------------|---------------------------|-------------------------------------|---------------------------|-------------------------------------|---------------------------|--------------------------|
| Aldehydes | (E)-2-Octenal       | 24.12±1.34 <sub>e</sub>              | 23.28±2.91 <sub>e</sub>             | 56.68±7.37 <sub>d</sub>   | 63.14±19.8 <sub>8<sup>d</sup></sub> | 48.24±1.45 <sub>de</sub>            | 127.76±33.22 <sup>b</sup> | 42.79±3.30 <sub>de</sub>            | 102.52±15.91 <sup>c</sup> | 100.54±11.00 <sup>c</sup>           | 114.04±8.18 <sup>bc</sup> | 152.18±6.23 <sup>a</sup> |
|           | Benzeneacetaldehyde | 294.91±35.70 <sup>a</sup>            | 303.14±14.12 <sup>a</sup>           | 138.16±9.31 <sup>b</sup>  | 178.20±90.45 <sup>b</sup>           | 139.02±26.23 <sup>b</sup>           | 149.34±10.36 <sup>b</sup> | 67.14±6.31 <sub>c</sub>             | 167.54±21.46 <sup>b</sup> | 118.55±13.30 <sup>bc</sup>          | 161.54±26.86 <sup>b</sup> | 175.36±9.38 <sup>b</sup> |
|           | Benzaldehyde        | 65.47±11.75 <sup>e</sup>             | 61.13±7.94 <sub>ef</sub>            | 53.40±13.21 <sub>ef</sub> | 146.60±4.17 <sup>bc</sup>           | 38.33±7.24 <sub>f</sub>             | 165.81±15.75 <sup>b</sup> | 51.73±19.31 <sub>ef</sub>           | 125.81±23.05 <sup>c</sup> | 88.45±7.10 <sub>d</sub>             | 158.29±6.78 <sup>b</sup>  | 219.89±4.49 <sup>a</sup> |
|           | Nonanal             | 61.94±4.93 <sub>de</sub>             | 62.30±1.71 <sub>de</sub>            | 47.72±0.82 <sub>e</sub>   | 55.40±16.21 <sub>de</sub>           | 94.67±20.83 <sup>b</sup>            | 173.07±23.94 <sup>a</sup> | 23.17±5.17 <sub>f</sub>             | 88.54±9.84 <sub>bc</sub>  | 70.83±3.97 <sub>cd</sub>            | 53.66±5.67 <sub>de</sub>  | 104.20±5.50 <sup>b</sup> |
|           | (E)-2-Nonenal       | 14.41±0.94 <sub>f</sub>              | 12.69±2.76 <sub>f</sub>             | 13.78±4.22 <sub>f</sub>   | 20.10±0.13 <sub>ef</sub>            | 27.53±11.86 <sup>def</sup>          | 34.83±4.33 <sub>cde</sub> | 19.62±7.50 <sub>ef</sub>            | 47.14±10.46 <sup>bc</sup> | 40.80±15.50 <sup>cd</sup>           | 59.31±9.82 <sub>ab</sub>  | 70.73±10.18 <sup>a</sup> |
|           | 2,4-Nonadienal      | 0.31±0.54 <sup>c</sup>               | 0.20±0.35 <sup>c</sup>              | 1.41±0.73 <sup>c</sup>    | 4.43±3.36 <sup>b</sup> <sub>c</sub> | 6.72±1.72 <sup>b</sup> <sub>c</sub> | 12.65±1.46 <sub>b</sub>   | 1.82±0.73 <sup>c</sup>              | 8.96±15.52 <sub>bc</sub>  | 8.63±2.32 <sup>b</sup> <sub>c</sub> | 13.47±0.65 <sub>b</sub>   | 27.99±0.63 <sub>a</sub>  |
|           | β-Cyclocitral       | 4.61±1.14 <sup>c</sup>               | 4.75±1.30 <sup>c</sup>              | 4.33±1.54 <sup>c</sup>    | 9.17±1.32 <sup>b</sup> <sub>c</sub> | 11.3±2.46 <sup>b</sup>              | 16.39±3.93 <sub>a</sub>   | 8.56±2.05 <sup>b</sup> <sub>c</sub> | 20.76±1.05 <sub>a</sub>   | 16.97±2.02 <sub>a</sub>             | 18.27±2.53 <sub>a</sub>   | 20.28±5.77 <sub>a</sub>  |
|           | (Z)-citral          | /                                    | /                                   | 7.55±2.05 <sup>c</sup>    | 2.66±4.61 <sup>c</sup>              | 6.55±1.84 <sup>c</sup>              | 3.60±6.24 <sup>c</sup>    | 2.14±3.71 <sup>c</sup>              | 70.32±30.30 <sup>a</sup>  | 28.71±9.17 <sub>b</sub>             | 67.13±8.38 <sub>a</sub>   | 72.47±7.15 <sub>a</sub>  |
|           | Decanal             | 21.77±0.99 <sub>c</sub>              | 21.54±5.60 <sub>c</sub>             | 19.88±1.95 <sub>c</sub>   | 28.33±3.52 <sub>bc</sub>            | 33.76±15.09 <sup>abc</sup>          | 45.05±2.73 <sub>ab</sub>  | 16.43±6.21 <sub>c</sub>             | 48.26±26.39 <sup>a</sup>  | 28.08±3.72 <sub>bc</sub>            | 40.72±5.66 <sub>ab</sub>  | 47.45±7.37 <sub>a</sub>  |
|           | Hexadecanal         | 5.41±1.40 <sup>d</sup> <sub>ef</sub> | 6.25±1.31 <sup>d</sup> <sub>e</sub> | 2.84±0.41 <sup>f</sup>    | 2.80±0.53 <sup>f</sup>              | 3.40±0.86 <sup>ef</sup>             | 6.63±0.13 <sup>d</sup>    | 3.06±1.13 <sup>f</sup>              | 9.77±2.07 <sup>c</sup>    | 6.63±1.31 <sup>d</sup>              | 32.14±3.66 <sub>b</sub>   | 39.29±2.19 <sub>a</sub>  |
|           | Tetradecanal        | 3.38±0.61 <sup>d</sup>               | 3.73±0.75 <sup>d</sup>              | 2.28±0.77 <sup>d</sup>    | 3.98±0.01 <sup>d</sup>              | 2.40±0.18 <sup>d</sup>              | 7.58±0.40 <sup>c</sup>    | 5.10±0.23 <sup>c</sup>              | 4.88±1.89 <sup>d</sup>    | 10.73±3.64                          | 3.05±0.15 <sup>d</sup>    | 34.07±2.48               |

|          |                         |                                      |                                      |                                      |                                      |                            | d                                      |                                     | b                                    |                                                    | a                                     |                                      |
|----------|-------------------------|--------------------------------------|--------------------------------------|--------------------------------------|--------------------------------------|----------------------------|----------------------------------------|-------------------------------------|--------------------------------------|----------------------------------------------------|---------------------------------------|--------------------------------------|
| Alcohols | Linalool                | 4.06±0.42 <sup>c</sup>               | 4.44±2.36 <sup>c</sup>               | 5.49±2.11 <sup>c</sup>               | 9.61±4.47 <sup>c</sup>               | 3.49±1.83 <sup>c</sup>     | 19.41±9.38 <sup>c</sup>                | 14.21±6.91 <sup>c</sup>             | 83.41±18.4 <sup>7<sup>c</sup></sup>  | 263.73±11. <sup>65<sup>b</sup></sup>               | 366.97±16 <sup>9.18<sup>a</sup></sup> | 262.64±7.7 <sup>1<sup>b</sup></sup>  |
|          | 1-Octanol               | 16.07±2.24 <sup>c</sup>              | 15.55±1.15 <sup>c</sup>              | 15.87±3.70 <sup>c</sup>              | 21.40±3.89 <sup>c</sup>              | 19.74±0.30 <sup>c</sup>    | 54.93±4.34 <sup>a</sup>                | 19.60±0.74 <sup>c</sup>             | 39.17±6.55 <sup>b</sup>              | 35.61±3.42 <sup>b</sup>                            | 39.96±3.31 <sup>b</sup>               | 48.74±6.49 <sup>a</sup>              |
|          | 1-Octen-3-ol            | 36.06±8.75 <sup>bc</sup>             | 37.1±0.04 <sup>b</sup> <sup>c</sup>  | 40.13±13.7 <sup>8<sup>b</sup></sup>  | 26.09±0.57 <sup>c</sup>              | 56.6±1.75 <sup>a</sup>     | /                                      | 36.86±8.09 <sup>bc</sup>            | 57.16±10.6 <sup>2<sup>a</sup></sup>  | 32.99±6.16 <sup>bc</sup>                           | 29.37±1.47 <sup>bc</sup>              | 62.43±6.13 <sup>a</sup>              |
|          | Citronellol             | /                                    | /                                    | /                                    | /                                    | /                          | /                                      | /                                   | /                                    | 70.33±121. <sup>81<sup>c</sup></sup>               | 371.54±15 <sup>0.66<sup>b</sup></sup> | 435.43±15. <sup>44<sup>a</sup></sup> |
|          | (E)-2-Octen-1-ol        | 3.85±0.76 <sup>d</sup> <sup>e</sup>  | 3.89±0.19 <sup>d</sup> <sup>e</sup>  | 2.13±3.70 <sup>e</sup>               | 8.70±3.74 <sup>c</sup> <sup>d</sup>  | 12.72±2.37 <sup>bc</sup>   | 17.20±3.16 <sup>ab</sup>               | 5.50±1.12 <sup>d</sup> <sup>e</sup> | 16.21±5.51 <sup>ab</sup>             | 7.90±0.47 <sup>c</sup> <sup>d</sup>                | 15.10±1.91 <sup>ab</sup>              | 19.82±3.70 <sup>a</sup>              |
|          | Phenylethyl Alcohol     | 96.22±15.4 <sup>7<sup>bc</sup></sup> | 92.96±14.0 <sup>9<sup>bc</sup></sup> | 73.20±13.6 <sup>7<sup>cd</sup></sup> | 89.25±23.9 <sup>8<sup>bc</sup></sup> | 53.47±5.16 <sup>de</sup>   | 77.95±11.9 <sup>5<sup>cd</sup></sup>   | 33.22±14.3 <sup>4<sup>c</sup></sup> | 117.09±14. <sup>48<sup>b</sup></sup> | 49.46±15.2 <sup>2<sup>de</sup></sup>               | 100.66±4.8 <sup>1<sup>bc</sup></sup>  | 195.43±27. <sup>85<sup>a</sup></sup> |
|          | Myrtenol                | 35.41±3.05 <sup>def</sup>            | 33.34±3.38 <sup>ef</sup>             | 31.35±6.71 <sup>f</sup>              | 53.29±6.11 <sup>bc</sup>             | 40.21±3.16 <sup>cdef</sup> | 44.13±10.1 <sup>2<sup>cdef</sup></sup> | 48.71±8.82 <sup>bcd</sup>           | 60.00±1.08 <sup>b</sup>              | 47.32±14.6 <sup>8<sup>bcd</sup></sup> <sup>e</sup> | 88.24±2.08 <sup>a</sup>               | 76.44±10.4 <sup>7<sup>a</sup></sup>  |
|          | Nerol                   | 41.66±10.3 <sup>7<sup>d</sup></sup>  | 42.83±6.16 <sup>d</sup>              | 44.61±6.63 <sup>d</sup>              | 40.32±1.98 <sup>d</sup>              | 41.35±3.11 <sup>d</sup>    | 53.84±3.68 <sup>d</sup>                | 47.00±5.18 <sup>d</sup>             | 85.30±12.8 <sup>0<sup>c</sup></sup>  | 217.48±26. <sup>75<sup>a</sup></sup>               | 152.31±14. <sup>25<sup>b</sup></sup>  | 199.43±43. <sup>68<sup>a</sup></sup> |
|          | (Z)-3-Nonen-1-ol        | 4.74±1.17 <sup>c</sup>               | 4.92±8.52 <sup>c</sup>               | 13.00±4.38 <sup>c</sup>              | 25.36±6.60 <sup>bc</sup>             | 20.33±2.23 <sup>bc</sup>   | 34.38±4.41 <sup>bc</sup>               | 17.85±7.91 <sup>c</sup>             | 83.48±21.8 <sup>3<sup>a</sup></sup>  | 54.37±1.23 <sup>ab</sup>                           | 73.06±14.7 <sup>1<sup>a</sup></sup>   | 30.15±52.2 <sup>2<sup>bc</sup></sup> |
|          | trans-farnesol          | /                                    | /                                    | /                                    | /                                    | /                          | 0.48±0.83 <sup>d</sup>                 | 3.69±0.41 <sup>d</sup>              | 7.37±1.21 <sup>d</sup>               | 17.91±1.37 <sup>c</sup>                            | 44.01±12.4 <sup>6<sup>b</sup></sup>   | 87.58±6.30 <sup>a</sup>              |
| Alkanes  | p-Menth-2-en-7-ol, cis- | 72.94±83.7 <sup>0<sup>a</sup></sup>  | 61.50±106. <sup>53<sup>a</sup></sup> | 57.17±1.34 <sup>a</sup>              | 61.71±5.82 <sup>a</sup>              | 57.26±7.18 <sup>a</sup>    | 69.71±6.21 <sup>a</sup>                | 102.57±2.5 <sup>0<sup>a</sup></sup> | 77.34±32.2 <sup>1<sup>a</sup></sup>  | 81.08±34.1 <sup>2<sup>a</sup></sup>                | 71.43±2.02 <sup>a</sup>               | 55.66±14.6 <sup>6<sup>a</sup></sup>  |
|          | 1-                      | /                                    | /                                    | /                                    | /                                    | /                          | 1.25±2.16 <sup>b</sup>                 | 4.14±7.17 <sup>b</sup>              | 9.12±15.80                           | /                                                  | 19.58±33.9                            | 153.72±63.                           |

|         |                        |                        |                        |                                     |                                      |                                     |                                      |                                     |                                      |                                      |                                       |                                      |
|---------|------------------------|------------------------|------------------------|-------------------------------------|--------------------------------------|-------------------------------------|--------------------------------------|-------------------------------------|--------------------------------------|--------------------------------------|---------------------------------------|--------------------------------------|
|         | Chlorooctadecane       |                        |                        |                                     |                                      |                                     |                                      |                                     | b                                    |                                      | 2 <sup>b</sup>                        | 54 <sup>a</sup>                      |
|         | Pentadecane, 3-methyl- | /                      | /                      | 0.97±0.31 <sup>b</sup> <sub>c</sub> | 1.14±1.97 <sup>b</sup> <sub>c</sub>  | 1.36±0.07 <sup>b</sup> <sub>c</sub> | 2.86±1.91 <sup>b</sup> <sub>c</sub>  | 1.72±0.45 <sup>b</sup> <sub>c</sub> | 2.03±0.35 <sup>b</sup> <sub>c</sub>  | 3.40±1.75 <sup>c</sup>               | 3.93±1.24 <sup>b</sup>                | 26.20±3.64 <sub>a</sub>              |
|         | Tridecane              | /                      | /                      | /                                   | 2.31±4.00 <sup>c</sup>               | /                                   | 1.49±2.58 <sup>c</sup>               | /                                   | 14.79±12.8 <sub>8<sup>ab</sup></sub> | 4.05±0.73 <sup>c</sup>               | 7.94±1.57 <sup>b</sup> <sub>c</sub>   | 19.61±3.77 <sub>a</sub>              |
|         | Pentadecane            | 4.58±1.88 <sup>c</sup> | 4.19±1.35 <sup>c</sup> | 6.47±0.69 <sup>c</sup>              | 22.53±6.66 <sub>bc</sub>             | 8.72±0.52 <sup>c</sup>              | 10.63±4.33 <sub>c</sub>              | 11.79±0.87 <sub>c</sub>             | 39.53±17.5 <sub>b</sub>              | 42.64±2.09 <sub>b</sub>              | /                                     | 81.69±47.1 <sub>4<sup>a</sup></sub>  |
|         | Hexadecane             | 3.84±0.82 <sup>d</sup> | 3.08±0.12 <sup>d</sup> | 7.58±0.43 <sup>d</sup>              | 40.71±9.25 <sub>a</sub>              | 10.88±1.55 <sub>cd</sub>            | 15.41±0.02 <sub>bcd</sub>            | 26.44±0.90 <sub>abc</sub>           | 31.72±5.47 <sub>a</sub>              | 39.75±5.74 <sub>a</sub>              | 12.16±1.96 <sub>cd</sub>              | 30.48±26.4 <sub>0<sup>ab</sup></sub> |
|         | Heptadecane            | 4.91±0.51 <sup>c</sup> | 5.32±0.32 <sup>c</sup> | 4.33±0.57 <sup>ef</sup>             | 15.52±0.46 <sub>b</sub>              | 7.95±0.91 <sup>d</sup>              | 7.42±1.63 <sup>d</sup>               | 5.49±0.47 <sup>c</sup>              | 2.95±0.48 <sup>f</sup>               | 13.63±2.09 <sub>c</sub>              | 8.35±1.34 <sup>d</sup>                | 43.51±0.11 <sub>a</sub>              |
|         | Tetratetracontane      | /                      | /                      | /                                   | 0.65±1.13 <sup>b</sup>               | /                                   | 0.54±0.94 <sup>b</sup>               | /                                   | /                                    | 6.55±2.79 <sup>b</sup>               | 4.92±8.52 <sup>b</sup>                | 21.33±10.6 <sub>4<sup>a</sup></sub>  |
| Alkenes | α-Caryophyllene        | 8.85±0.19 <sup>c</sup> | 8.03±1.93 <sup>c</sup> | 4.93±2.66 <sup>c</sup>              | 10.08±3.13 <sub>c</sub>              | 5.96±2.58 <sup>c</sup>              | 14.51±9.86 <sub>c</sub>              | 10.95±2.35 <sub>c</sub>             | 27.30±5.44 <sub>c</sub>              | 56.19±33.8 <sub>3<sup>b</sup></sub>  | 13.52±23.4 <sub>1<sup>c</sup></sub>   | 92.53±1.27 <sub>a</sub>              |
|         | Alloaromadendrene      | 2.73±0.13 <sup>c</sup> | 2.49±4.31 <sup>c</sup> | 2.69±4.66 <sup>c</sup>              | 34.42±20.3 <sub>1<sup>bc</sup></sub> | /                                   | 38.58±66.8 <sub>2<sup>bc</sup></sub> | 15.87±6.58 <sub>bc</sub>            | 11.45±19.8 <sub>4<sup>bc</sup></sub> | 57.42±32.2 <sub>2<sup>ab</sup></sub> | 53.27±10.8 <sub>4<sup>abc</sup></sub> | 97.01±24.7 <sub>6<sup>a</sup></sub>  |
|         | (-)-Aristolene         | 4.74±1.15 <sup>c</sup> | 4.58±1.51 <sup>c</sup> | 3.60±1.32 <sup>c</sup>              | 5.41±1.98 <sup>c</sup>               | 3.66±1.76 <sup>c</sup>              | 8.44±5.91 <sup>c</sup>               | 7.38±0.84 <sup>c</sup>              | 6.64±11.50 <sub>c</sub>              | 27.84±15.3 <sub>5<sup>b</sup></sub>  | 19.98±3.69 <sub>b</sub>               | 56.63±4.29 <sub>a</sub>              |
|         | Caryophyllene          | 4.00±1.89 <sup>c</sup> | 3.75±0.95 <sup>c</sup> | 4.00±0.31 <sup>c</sup>              | 11.47±0.61 <sub>bc</sub>             | 4.70±8.14 <sup>c</sup>              | 7.28±2.46 <sup>c</sup>               | 6.76±0.03 <sup>c</sup>              | 20.86±0.81 <sub>b</sub>              | 6.27±10.85 <sub>c</sub>              | 1.27±2.20 <sup>c</sup>                | 77.14±16.3 <sub>6<sup>a</sup></sub>  |
|         | β-Sesquiphellandrene   | /                      | /                      | 6.72±11.64 <sub>c</sub>             | /                                    | 11.81±1.59 <sub>c</sub>             | 110.56±83.98 <sup>b</sup>            | 116.59±21.51 <sup>b</sup>           | 193.52±38.16 <sup>a</sup>            | 210.23±8.0 <sub>3<sup>a</sup></sub>  | 148.14±11.68 <sup>ab</sup>            | 38.32±66.3 <sub>8<sup>c</sup></sub>  |
|         | α-Gurjunene            | 64.69±6.57             | 65.25±6.91             | 50.15±7.82                          | 238.92±93.                           | 14.09±5.10                          | 276.10±13                            | 115.18±15.                          | 158.30±35.                           | 205.18±16.                           | 191.15±39.                            | 417.25±35.                           |

|                                  | ef                                  | ef                                  | f                                   | 11 <sup>bc</sup>                    | f                                   | 9.58 <sup>b</sup>                   | 06 <sup>def</sup>                   | 30 <sup>cde</sup>                   | .00 <sup>bcd</sup>                  | 27 <sup>bcd</sup>         | 55 <sup>a</sup>           |
|----------------------------------|-------------------------------------|-------------------------------------|-------------------------------------|-------------------------------------|-------------------------------------|-------------------------------------|-------------------------------------|-------------------------------------|-------------------------------------|---------------------------|---------------------------|
| Cedrene                          | /                                   | /                                   | /                                   | 7.22±12.51 <sub>c</sub>             | 4.30±7.45 <sup>c</sup>              | 5.18±8.97 <sup>c</sup>              | /                                   | /                                   | /                                   | 42.81±1.84 <sub>b</sub>   | 148.13±23.82 <sup>a</sup> |
| (+)-Valencene                    | /                                   | /                                   | /                                   | /                                   | /                                   | /                                   | /                                   | 2.16±3.75 <sup>c</sup>              | 6.95±3.18 <sup>c</sup>              | 18.77±11.28 <sup>b</sup>  | 28.32±2.25 <sub>a</sub>   |
| α-Selinene                       | 1.19±2.06 <sup>d</sup>              | 1.00±1.73 <sup>d</sup>              | 3.85±1.44 <sup>d</sup>              | 26.62±0.47 <sub>d</sub>             | 6.93±4.11 <sup>d</sup>              | 9.79±0.70 <sup>d</sup>              | 22.64±1.60 <sub>d</sub>             | 165.43±21.23 <sup>c</sup>           | 141.89±5.34 <sup>c</sup>            | 237.27±76.50 <sup>b</sup> | 447.81±22.16 <sup>a</sup> |
| γ-Muurolene                      | 4.75±0.46 <sup>c</sup> <sub>d</sub> | 4.09±0.33 <sup>c</sup> <sub>d</sub> | 4.45±0.27 <sup>c</sup> <sub>d</sub> | 3.23±5.60 <sup>d</sup>              | 3.80±2.29 <sup>c</sup> <sub>d</sub> | 5.61±2.13 <sup>c</sup> <sub>d</sub> | 2.15±3.72 <sup>d</sup>              | 3.63±0.25 <sup>d</sup>              | 9.34±0.39 <sup>c</sup>              | 45.92±3.32 <sub>b</sub>   | 75.73±5.48 <sub>a</sub>   |
| α-Guajene                        | 5.36±1.83 <sup>c</sup> <sub>d</sub> | 5.51±1.86 <sup>c</sup> <sub>d</sub> | 3.36±1.91 <sup>c</sup> <sub>d</sub> | 5.98±1.33 <sup>c</sup> <sub>d</sub> | 2.80±2.64 <sup>d</sup>              | 10.12±7.71 <sub>c</sub>             | 6.01±2.49 <sup>c</sup> <sub>d</sub> | 25.89±2.68 <sub>b</sub>             | 9.84±3.11 <sup>c</sup> <sub>d</sub> | 22.29±3.95 <sub>b</sub>   | 54.71±5.81 <sub>a</sub>   |
| α-Bergamotene                    | /                                   | /                                   | /                                   | /                                   | 0.78±1.35 <sup>c</sup>              | 0.91±1.58 <sup>c</sup>              | 3.62±1.18 <sup>c</sup>              | 65.35±3.88 <sub>d</sub>             | 110.53±2.46 <sup>c</sup>            | 207.04±12.03 <sup>a</sup> | 171.63±26.87 <sup>b</sup> |
| β-Cubebene                       | 2.51±0.36 <sup>f</sup>              | 2.40±0.98 <sup>f</sup>              | 2.27±0.96 <sup>f</sup>              | 7.13±1.88 <sup>d</sup> <sub>e</sub> | 4.10±1.69 <sup>ef</sup>             | 5.39±0.89 <sup>ef</sup>             | 4.81±2.58 <sup>ef</sup>             | 31.14±0.16 <sub>b</sub>             | 9.69±1.91 <sup>c</sup> <sub>d</sub> | 13.63±3.80 <sub>c</sub>   | 36.54±5.35 <sub>a</sub>   |
| β-Elemene                        | 5.76±0.69 <sup>e</sup>              | 5.36±0.62 <sup>e</sup>              | 6.27±1.07 <sup>e</sup>              | 17.88±3.31 <sub>d</sub>             | 6.32±2.15 <sup>e</sup>              | 12.27±1.16 <sub>de</sub>            | 8.44±0.30 <sup>e</sup>              | 32.29±8.20 <sub>c</sub>             | 38.33±5.41 <sub>c</sub>             | 83.93±0.56 <sub>b</sub>   | 125.35±6.39 <sup>a</sup>  |
| α-Copaene                        | 10.24±0.45 <sub>d</sub>             | 10.91±0.64 <sub>d</sub>             | 9.90±0.51 <sup>d</sup>              | 31.57±7.28 <sub>c</sub>             | 7.53±0.03 <sup>d</sup>              | 12.46±1.25 <sub>d</sub>             | 11.93±1.33 <sub>d</sub>             | 23.97±7.13 <sub>c</sub>             | 25.80±2.97 <sub>c</sub>             | 44.77±1.87 <sub>b</sub>   | 88.50±18.76 <sup>a</sup>  |
| α-Cubebene                       | /                                   | /                                   | 0.86±1.49 <sup>fg</sup>             | 4.44±0.57 <sup>d</sup> <sub>e</sub> | 1.07±1.85 <sup>fg</sup>             | 7.81±3.61 <sup>b</sup> <sub>c</sub> | 2.81±0.93 <sup>ef</sup>             | 5.90±0.29 <sup>c</sup> <sub>d</sub> | 6.18±0.94 <sup>c</sup> <sub>d</sub> | 9.66±0.54 <sup>b</sup>    | 15.51±1.82 <sub>a</sub>   |
| Cyclosativene                    | 5.52±1.93 <sup>e</sup>              | 7.60±2.17 <sup>e</sup>              | 6.45±1.11 <sup>e</sup>              | 37.70±3.30 <sub>d</sub>             | 25.01±8.32 <sub>de</sub>            | 29.33±8.18 <sub>de</sub>            | 35.84±7.66 <sub>d</sub>             | 45.43±10.42 <sup>cd</sup>           | 66.14±15.14 <sup>c</sup>            | 117.97±6.67 <sup>b</sup>  | 255.96±40.02 <sup>a</sup> |
| 1,3-Hexadiene, 3-ethyl-2-methyl- | 14.55±2.79 <sub>f</sub>             | 12.41±2.00 <sub>f</sub>             | 29.42±9.08 <sub>e</sub>             | 49.80±9.84 <sub>cd</sub>            | 39.31±0.74 <sub>de</sub>            | 94.45±10.01 <sup>a</sup>            | 30.86±0.24 <sub>e</sub>             | 59.19±9.11 <sub>c</sub>             | 50.77±7.68 <sub>cd</sub>            | 74.88±7.35 <sub>b</sub>   | 59.85±6.34 <sub>c</sub>   |
| (-)-α-Panasinsen                 | /                                   | /                                   | 1.74±3.02 <sup>c</sup>              | 30.50±16.3                          | 0.31±0.53 <sup>c</sup>              | 29.38±50.8                          | 11.49±10.6                          | 25.12±1.18                          | 73.83±38.1                          | 50.36±16.1                | 17.73±1.80                |

|         |                                                   | 1 <sup>bc</sup>          |                          | 9 <sup>bc</sup>          |                          | 8 <sup>bc</sup>          |                                     | bc                                  |                                     | 8 <sup>a</sup>                      |                                     | 0 <sup>ab</sup>                      |  | bc |  |
|---------|---------------------------------------------------|--------------------------|--------------------------|--------------------------|--------------------------|--------------------------|-------------------------------------|-------------------------------------|-------------------------------------|-------------------------------------|-------------------------------------|--------------------------------------|--|----|--|
| Ketones | (E)-β-Ionone                                      | 22.84±3.65 <sub>bc</sub> | 23.39±3.18 <sub>bc</sub> | 16.47±4.89 <sub>bc</sub> | 19.03±6.14 <sub>bc</sub> | 17.53±5.39 <sub>bc</sub> | 87.76±35.5 <sub>a</sub>             | 16.49±4.56 <sub>bc</sub>            | 46.21±21.5 <sub>4<sup>b</sup></sub> | 10.11±17.5 <sub>1<sup>c</sup></sub> | 41.02±3.36 <sub>bc</sub>            | 19.59±33.9 <sub>4<sup>bc</sup></sub> |  |    |  |
|         | Artemisia ketone                                  | /                        | /                        | /                        | /                        | /                        | /                                   | /                                   | 8.54±14.79 <sub>b</sub>             | 8.87±15.36 <sub>b</sub>             | 12.74±3.68 <sub>b</sub>             | 54.47±29.5 <sub>3<sup>a</sup></sub>  |  |    |  |
|         | Ipomeamarone                                      | /                        | /                        | 2.85±1.72 <sup>e</sup>   | 9.33±2.90 <sup>e</sup>   | 4.52±0.58 <sup>e</sup>   | 12.93±3.16 <sub>e</sub>             | 244.52±33.80 <sup>c</sup>           | 2408.82±178.61 <sup>d</sup>         | 4283.17±296.03 <sup>c</sup>         | 6817.61±892.87 <sup>b</sup>         | 14203.80±1865.18 <sup>a</sup>        |  |    |  |
|         | 2-Hexanone, 1,1,1-trifluoro-dehydroipomeamarone   | /                        | /                        | /                        | /                        | /                        | /                                   | /                                   | 6.72±1.19 <sup>c</sup> <sub>d</sub> | 19.33±4.07 <sub>bc</sub>            | 23.58±11.4 <sub>0<sup>b</sup></sub> | 196.03±25.67 <sup>a</sup>            |  |    |  |
|         | 1-Acetyl-3-hydroxyadamantane                      | /                        | /                        | /                        | /                        | /                        | /                                   | 18.29±3.03 <sub>d</sub>             | 155.34±9.02 <sup>c</sup>            | 167.66±18.52 <sup>c</sup>           | 234.27±23.56 <sup>b</sup>           | 434.68±20.80 <sup>a</sup>            |  |    |  |
|         | (6E)-9-(3-Furyl)-2,6-dimethylnona-2,6-diene-4-one | /                        | /                        | /                        | /                        | /                        | /                                   | 98.18±7.10 <sub>e</sub>             | 286.37±156.33 <sup>d</sup>          | 634.89±98.68 <sup>c</sup>           | 899.77±140.03 <sup>b</sup>          | 2350.65±265.49 <sup>a</sup>          |  |    |  |
|         |                                                   | /                        | /                        | /                        | /                        | /                        | /                                   | 1.58±1.41 <sup>b</sup>              | 20.65±22.94 <sup>b</sup>            | 7.47±6.65 <sup>b</sup>              | 26.24±45.45 <sup>b</sup>            | 87.2±29.07 <sub>a</sub>              |  |    |  |
| Esters  | Benzeneacetic acid, ethyl ester                   | 19.57±3.11 <sub>ab</sub> | 19.40±8.34 <sub>ab</sub> | 10.46±3.64 <sub>c</sub>  | 15.64±3.82 <sub>bc</sub> | 10.02±1.15 <sub>c</sub>  | 12.88±3.31 <sub>bc</sub>            | 13.20±0.74 <sub>bc</sub>            | 17.31±1.95 <sub>b</sub>             | 12.99±1.64 <sub>bc</sub>            | 15.89±1.94 <sub>bc</sub>            | 25.21±2.85 <sub>a</sub>              |  |    |  |
|         | Ethyl palmitate                                   | 12.59±2.63 <sub>d</sub>  | 12.83±3.63 <sub>d</sub>  | 12.29±5.05 <sub>d</sub>  | 23.23±4.92 <sub>cd</sub> | 23.53±8.30 <sub>cd</sub> | 36.82±6.07 <sub>bc</sub>            | 20.64±9.37 <sub>d</sub>             | 46.71±11.34 <sup>b</sup>            | 44.80±0.30 <sub>b</sub>             | 78.78±7.26 <sub>a</sub>             | 89.95±16.06 <sup>a</sup>             |  |    |  |
|         | Methyl palmitate                                  | 0.42±0.73 <sup>f</sup>   | 0.52±0.91 <sup>f</sup>   | 4.27±0.43 <sup>e</sup>   | /                        | 2.67±0.32 <sup>ef</sup>  | 7.09±0.54 <sup>c</sup> <sub>d</sub> | 5.04±1.87 <sup>d</sup> <sub>e</sub> | 9.57±1.03 <sup>c</sup>              | 8.16±0.02 <sup>c</sup>              | 16.91±2.50 <sub>b</sub>             | 31.89±3.73 <sub>a</sub>              |  |    |  |
|         | Dibutyl phthalate                                 | 6.75±1.29 <sup>c</sup>   | 7.93±3.21 <sup>b</sup>   | 3.03±1.53 <sup>c</sup>   | 7.02±1.60 <sup>c</sup>   | 3.26±1.40 <sup>c</sup>   | 5.18±2.77 <sup>c</sup>              | 4.86±2.61 <sup>c</sup>              | 8.03±3.79 <sup>b</sup>              | 8.80±0.23 <sup>b</sup>              | 13.92±1.40                          | 16.25±8.51                           |  |    |  |

|        |                      |                                     |                        |                                     |                        |                        |                                     |                                     |                                     |                                     |                           |                           |
|--------|----------------------|-------------------------------------|------------------------|-------------------------------------|------------------------|------------------------|-------------------------------------|-------------------------------------|-------------------------------------|-------------------------------------|---------------------------|---------------------------|
|        |                      |                                     | c                      |                                     |                        |                        |                                     |                                     | c                                   | c                                   | ab                        | a                         |
|        | Diisobutyl phthalate | 4.82±1.42 <sup>d</sup>              | 4.29±0.97 <sup>d</sup> | 3.32±0.35 <sup>d</sup>              | 4.57±1.18 <sup>d</sup> | 2.88±0.28 <sup>d</sup> | 2.81±0.26 <sup>d</sup>              | 3.66±1.77 <sup>d</sup>              | 5.26±0.32 <sup>d</sup>              | 12.00±1.32 <sub>c</sub>             | 17.60±1.79 <sub>b</sub>   | 57.20±4.68 <sub>a</sub>   |
|        | Isopropyl Myristate  | 1.91±1.27 <sup>b</sup> <sub>c</sub> | 1.65±0.33 <sup>c</sup> | 5.30±1.06 <sup>b</sup> <sub>c</sub> | 1.45±0.20 <sup>c</sup> | 1.59±0.22 <sup>c</sup> | 2.03±0.26 <sup>b</sup> <sub>c</sub> | 2.05±0.88 <sup>b</sup> <sub>c</sub> | 5.72±1.11 <sup>b</sup> <sub>c</sub> | 3.41±0.71 <sup>b</sup> <sub>c</sub> | 7.60±1.75 <sup>b</sup>    | 22.13±9.74 <sub>a</sub>   |
|        | Dihydroactinolide    | 3.92±0.70 <sup>b</sup>              | 4.32±0.85 <sup>b</sup> | 3.34±1.33 <sup>b</sup>              | 6.42±1.44 <sup>b</sup> | 3.73±0.15 <sup>b</sup> | 10.9±1.57 <sup>b</sup>              | 4.02±1.14 <sup>b</sup>              | 8.98±1.82 <sup>b</sup>              | 4.68±1.21 <sup>b</sup>              | 9.64±0.71 <sup>b</sup>    | 27.61±19.96 <sup>a</sup>  |
| Others | Dendrolasin          | 3.75±1.21 <sup>e</sup>              | 3.18±0.50 <sup>e</sup> | 1.68±0.83 <sup>e</sup>              | 5.45±0.26 <sup>e</sup> | 4.07±0.84 <sup>e</sup> | 24.27±1.14 <sub>e</sub>             | 29.41±0.75 <sub>e</sub>             | 93.15±43.08 <sup>d</sup>            | 265.75±38.51 <sup>c</sup>           | 652.54±77.22 <sup>b</sup> | 767.37±62.87 <sup>a</sup> |
|        | Sesquirosefuran      | /                                   | /                      | /                                   | /                      | /                      | /                                   | /                                   | /                                   | /                                   | 9.63±1.31 <sup>b</sup>    | 34.26±0.45 <sub>a</sub>   |
|        | Cada-1,4-diene       | /                                   | /                      | /                                   | 1.05±1.81 <sup>b</sup> | /                      | 2.96±5.12 <sup>b</sup>              | 2.60±4.50 <sup>b</sup>              | 2.87±0.79 <sup>b</sup>              | 7.43±3.13 <sup>b</sup>              | 7.13±1.35 <sup>b</sup>    | 33.48±10.58 <sup>a</sup>  |

Data represent mean values ± standard deviations of three independent measurements. Values with different lowercase letters in the same row are significantly different (*p* < 0.05).

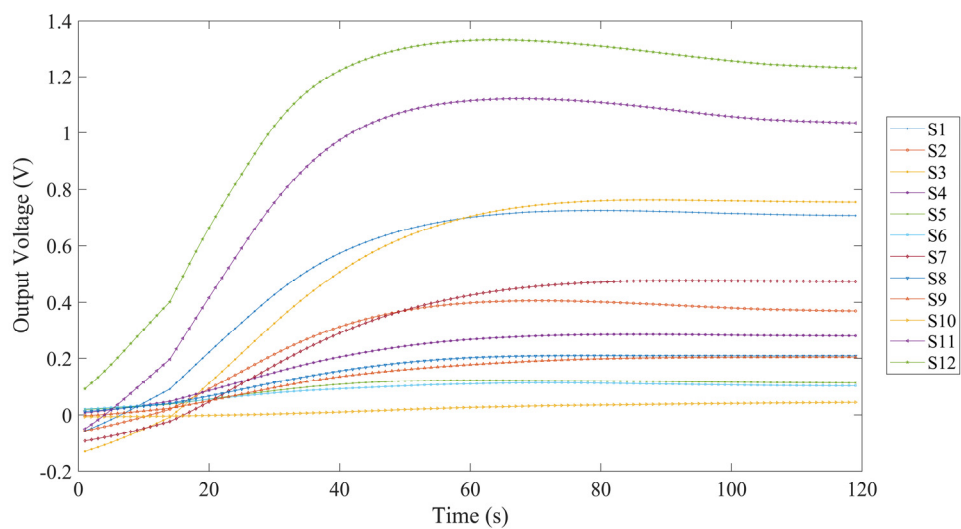

Figure S1. Response curves from twelve sensors of E-nose. The abscissa represents time (s), the ordinate represents the response signal (V), and each curve represents the response change of a sensor within 120 s.
